# Supplementary material for: Design, synthesis and properties investigation of Nα-acylation lysine based derivatives
Source: Royal Society of Chemistry journal article supplement (doi:10.1039/c9ra00213h), 2019-01-01

## **Design, synthesis and properties investigation of N<sup>α</sup>- acylation lysine based derivatives**

Ting-Ting Shi,<sup>a,b</sup> Zheng Fang,<sup>a</sup> Wen-Bo Zeng,<sup>a</sup> Wei He<sup>a</sup> and Kai Guo<sup>\*a,c</sup>

<sup>a</sup> College of Biotechnology and Pharmaceutical Engineering, Nanjing Technology University, Nanjing 211816, China;

Tel.: +86 25 5813 9926; Fax: +86 25 5813 9935; E-mail address: guok@njtech.edu.cn (K. Guo)

<sup>b</sup> Department of Chemistry, Bengbu Medical College, Bengbu 233030, China;

<sup>c</sup> State Key Laboratory of Materials-Oriented Chemical Engineering, Nanjing Technology University, Nanjing 211816, China;

### **Supporting Information**

#### **Table of contents**

|                                       |    |
|---------------------------------------|----|
| 1. Copies of NMR Spectra.....         | 2  |
| 2. Copies of MS Spectra .....         | 9  |
| 3. Copy of UV Absorption Spectra..... | 12 |
| 4. Copies of XRD .....                | 13 |

# 1. Copies of NMR Spectra

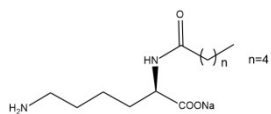

sodium N<sup>α</sup>- hexanamide lysine (4a)

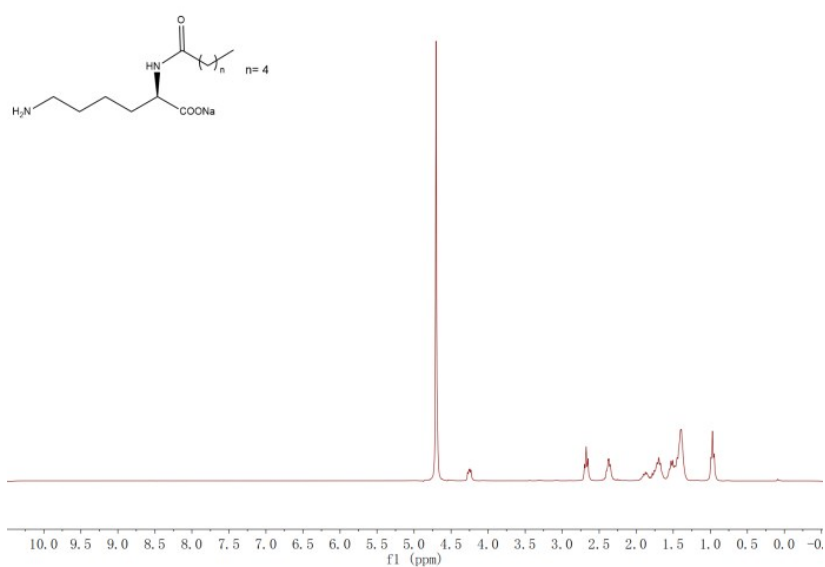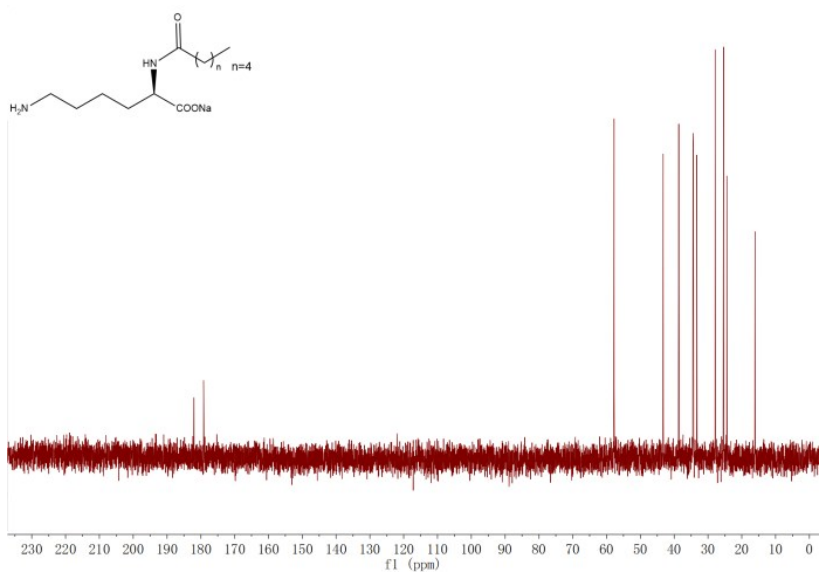

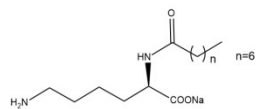

sodium N<sup>α</sup>- octanamide lysine (4b)

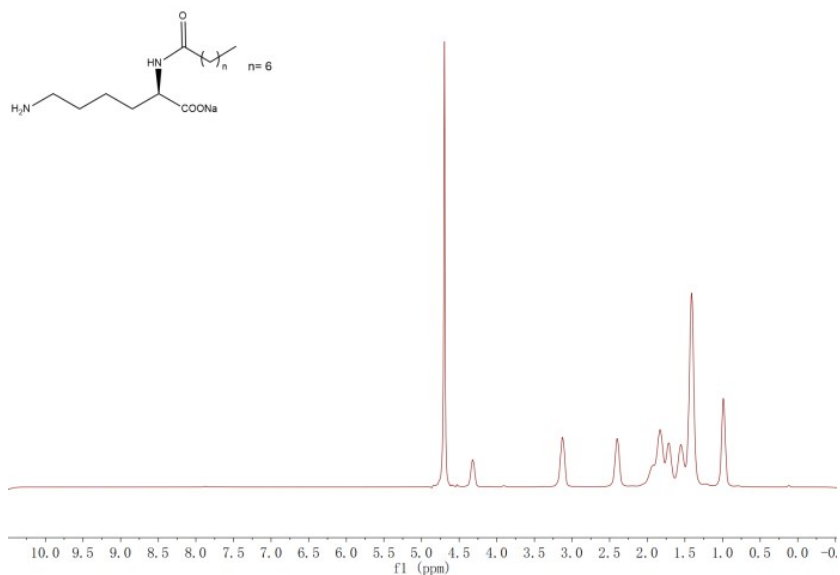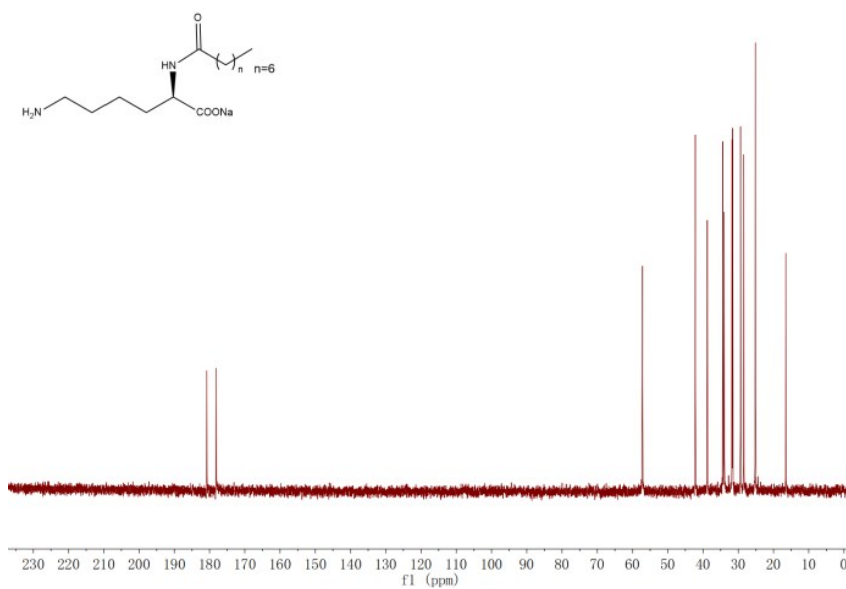

**sodium N<sup>α</sup>- capramide lysine (4c)**

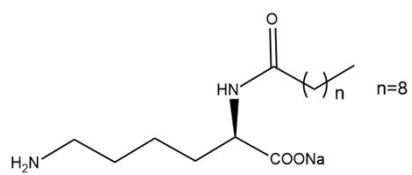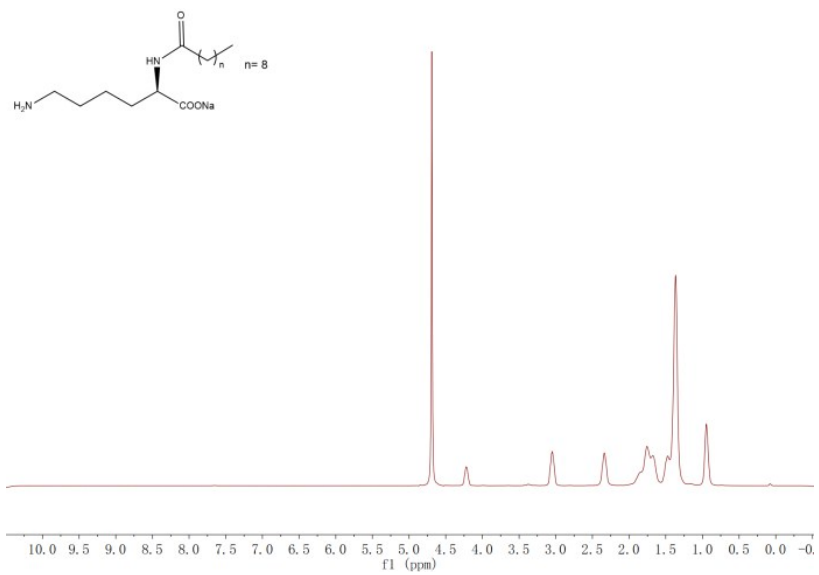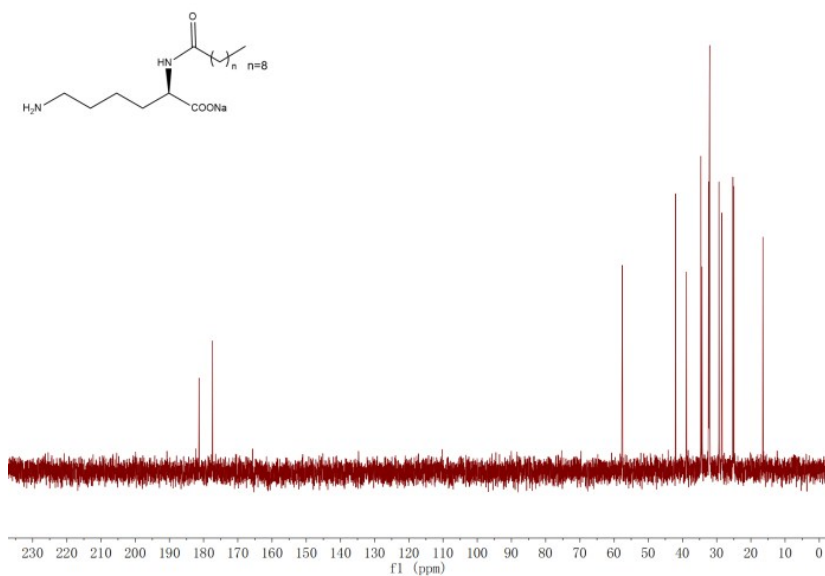

sodium N<sup>α</sup>- lauramide lysine (4d)

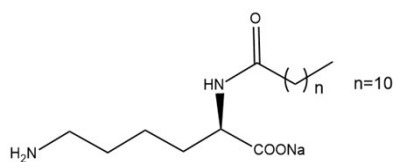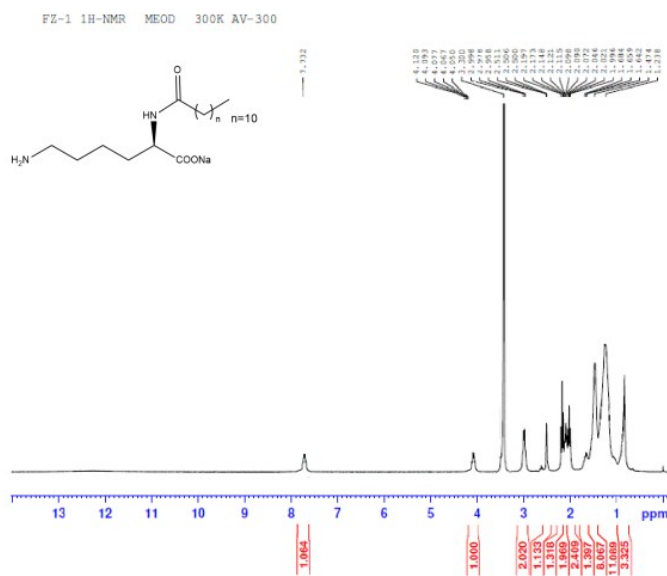

```

NAME      Fz1224
EXPNO     2
PROCNO    2
Date_     20121225
Time      6.23
INSTRUM   spect
PROBHD    5 mm QNP90
PULPROG   zgpg30
TD         32768
SOLVENT   DMSO
AQ         0.600
RG         3
SI         1
SF         300.136000
WDW        EM
SS         0
LB         0.20
GB         0
PC         1.00
  
```

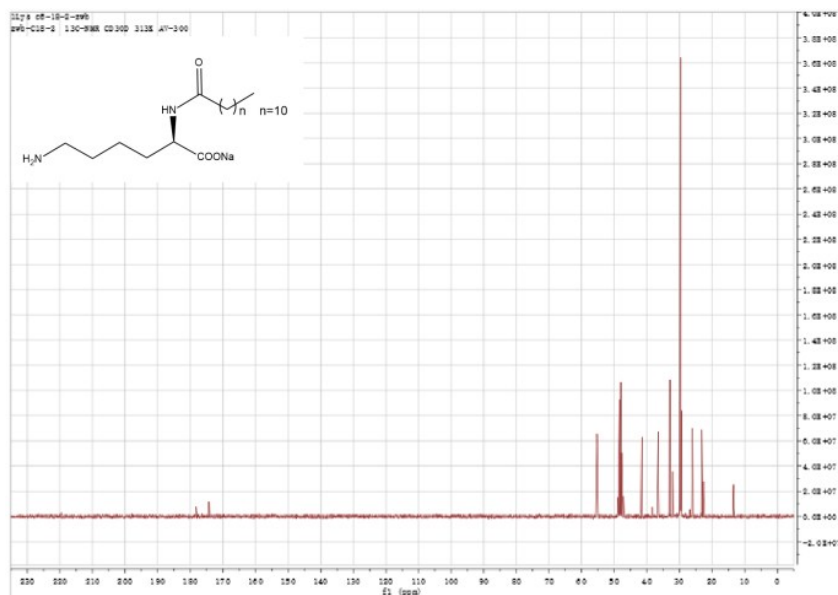

sodium N<sup>α</sup>- myristamide lysine (4e)

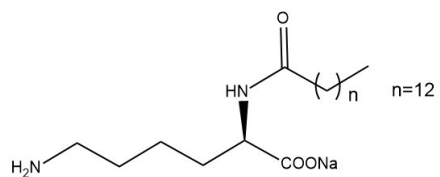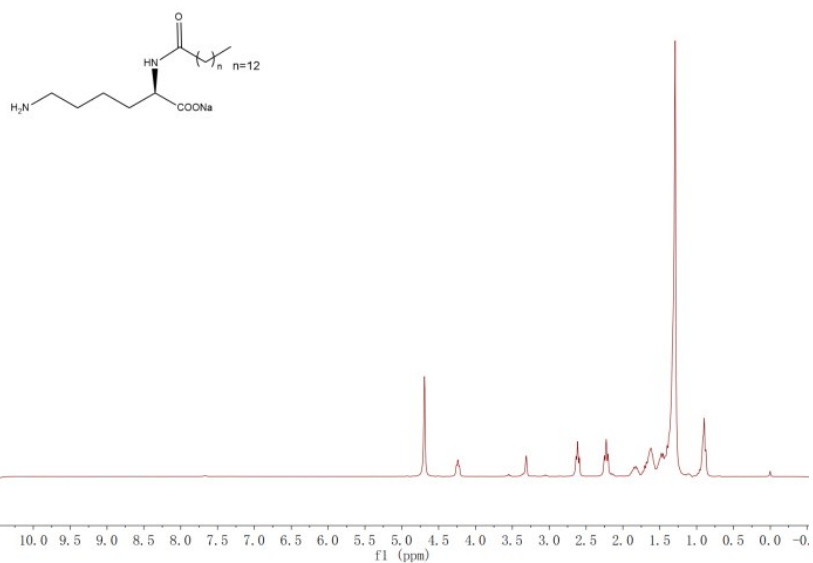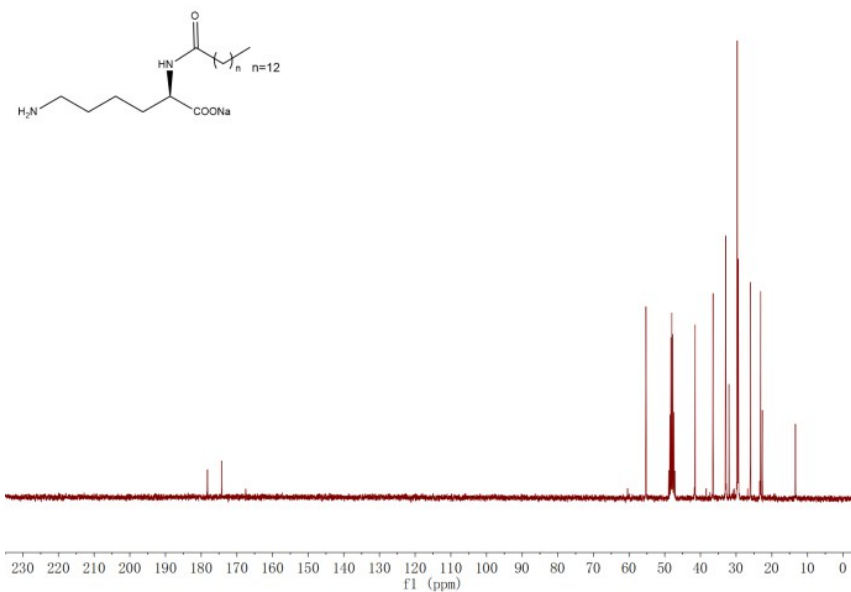

**sodium N<sup>α</sup>-palmitamide lysine (4f)**

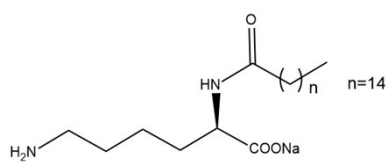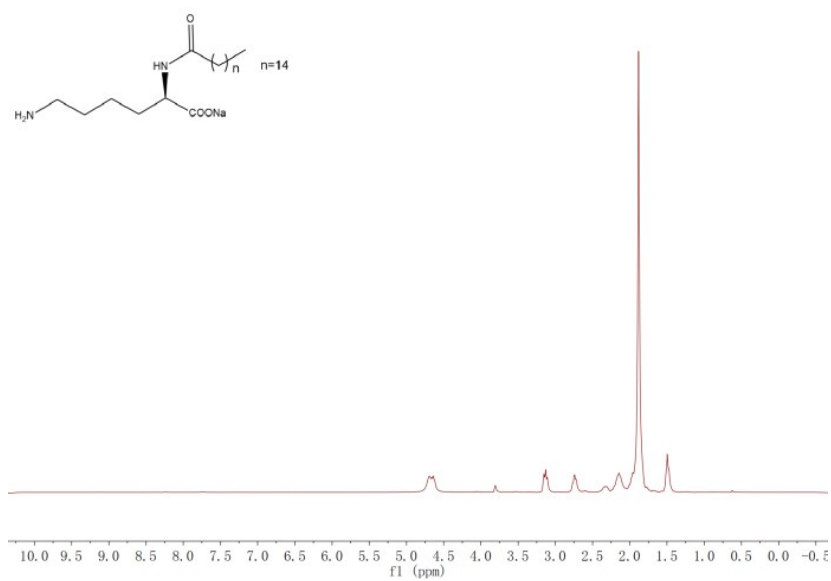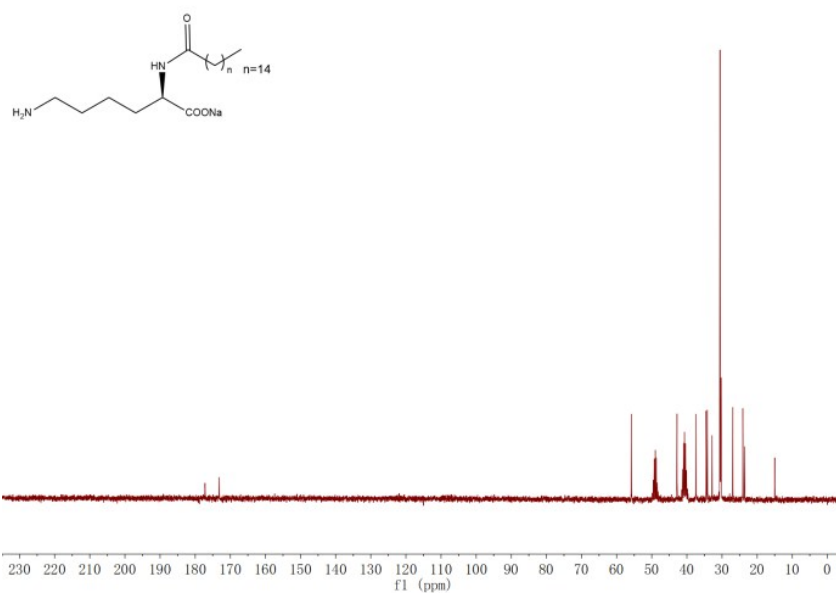

sodium N<sup>α</sup>- stearamide lysine (4g)

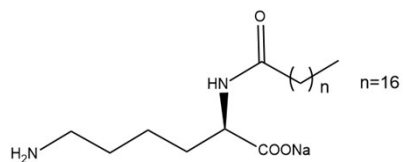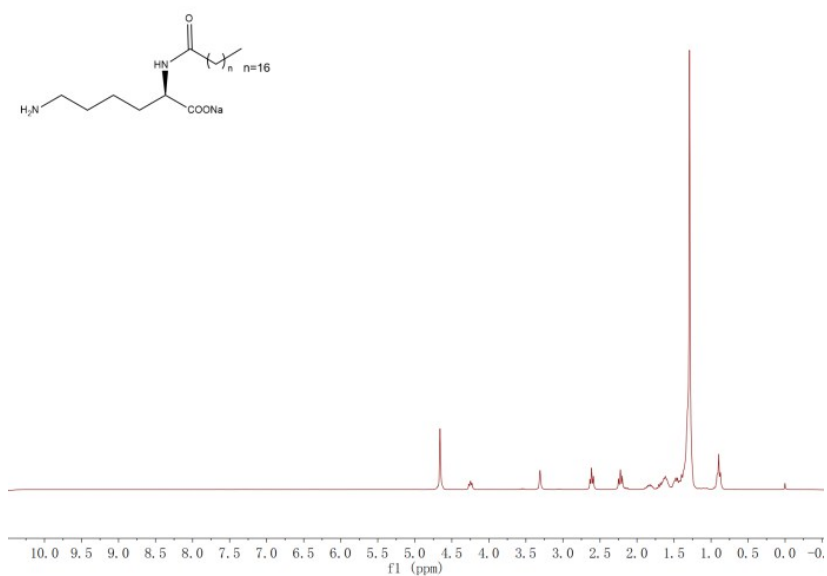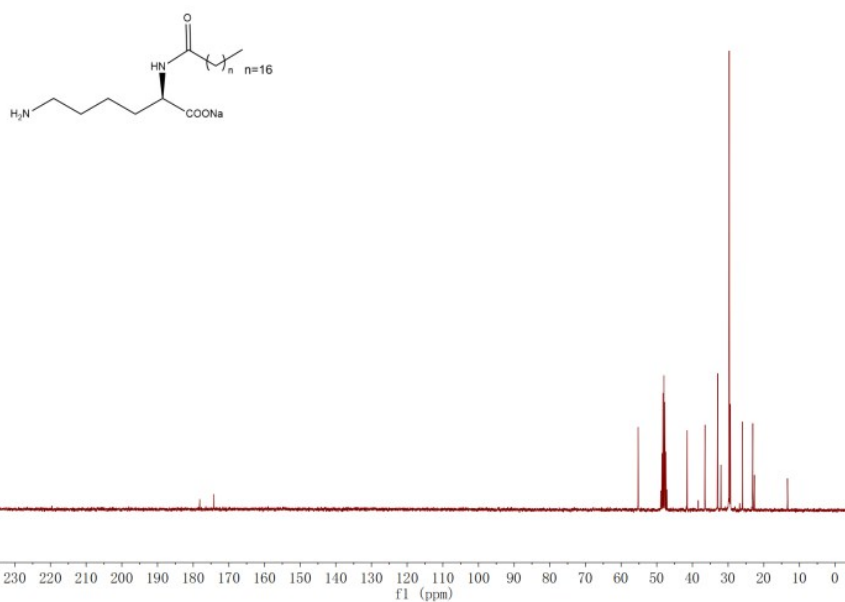



## 2. Copies of MS Spectra

### sodium N<sup>α</sup>- hexanamide lysine (4a)

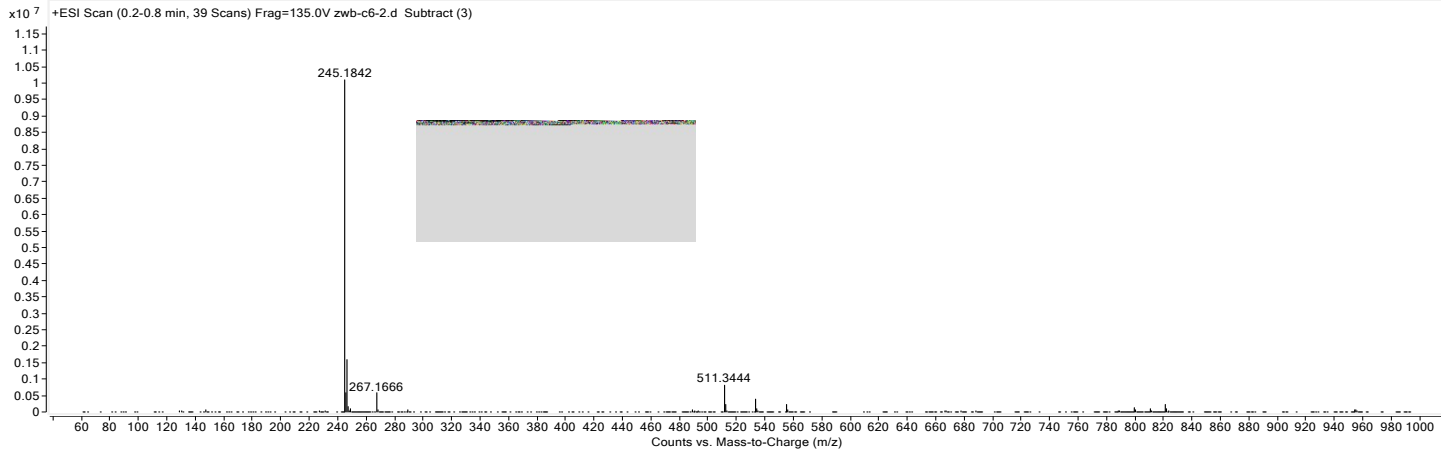

### sodium N<sup>α</sup>- octanamide lysine (4b)

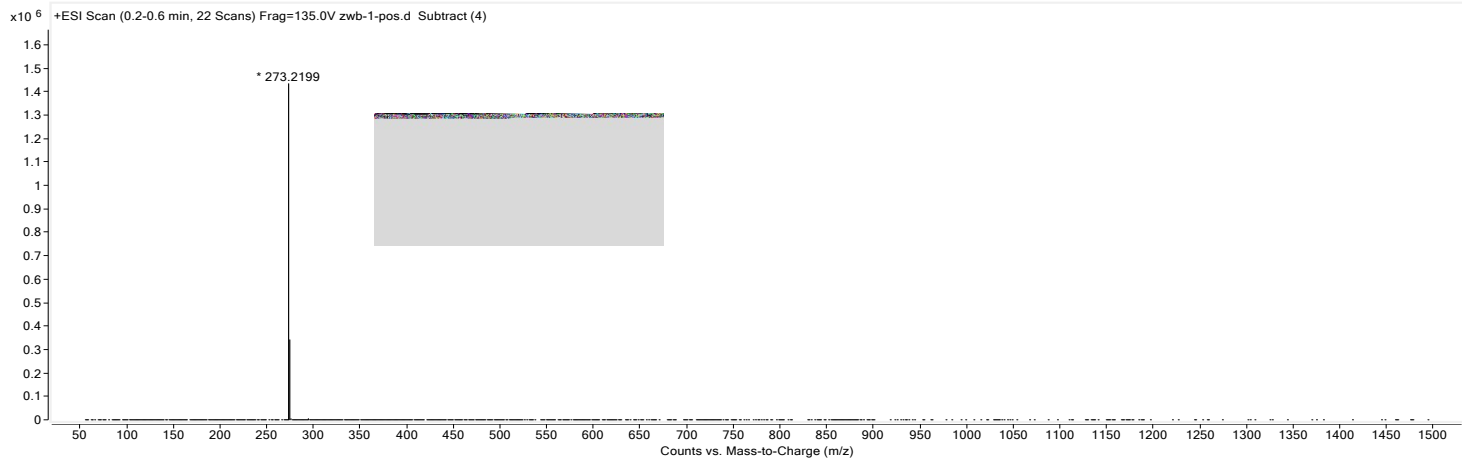

### sodium N<sup>α</sup>- capramide lysine (4c)

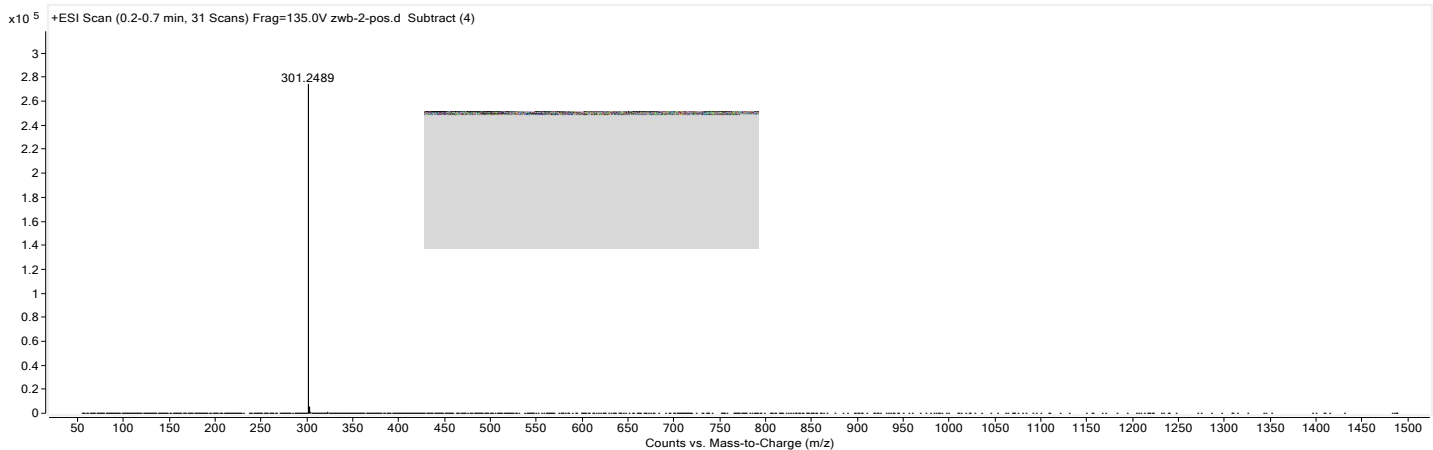

### sodium N<sup>α</sup>- lauramide lysine (4d)

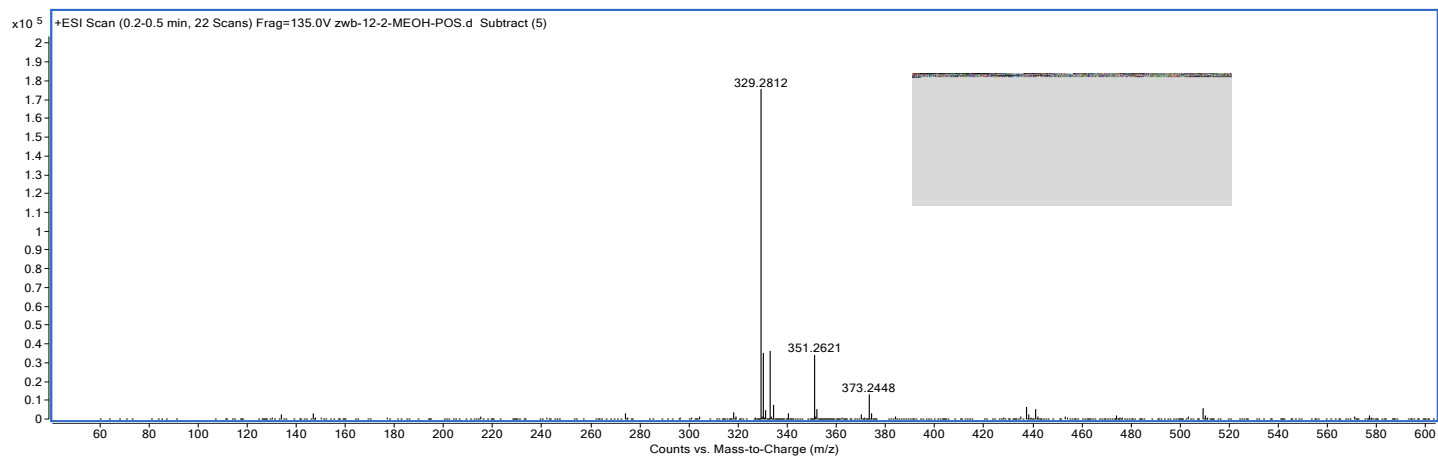

### sodium N<sup>α</sup>- myristamide lysine (4e)

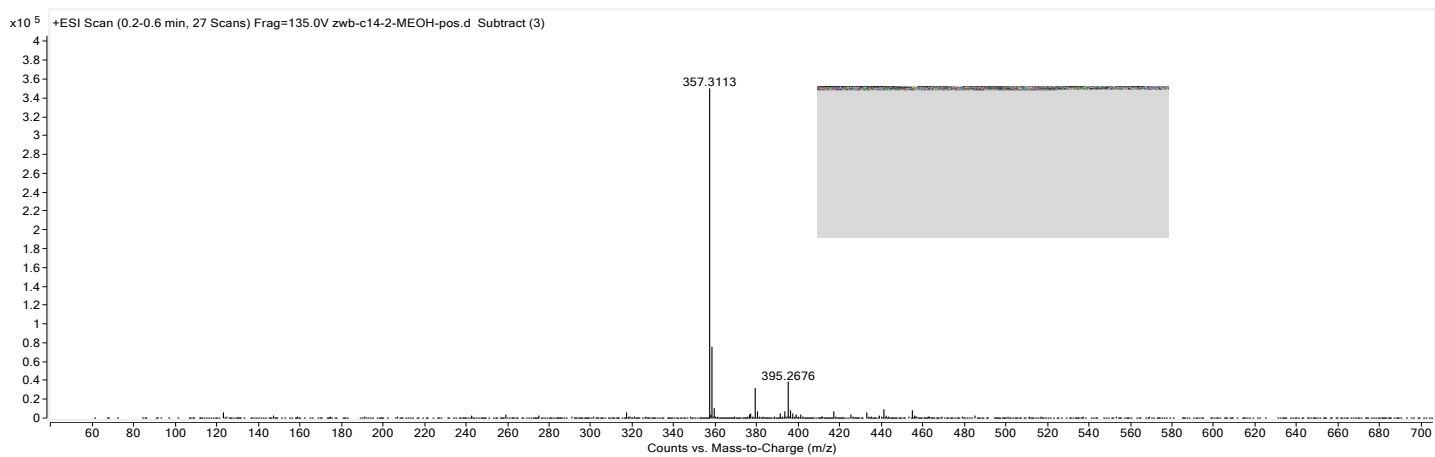

**Sodium N<sup>α</sup>-palmitamide lysine (4f)**

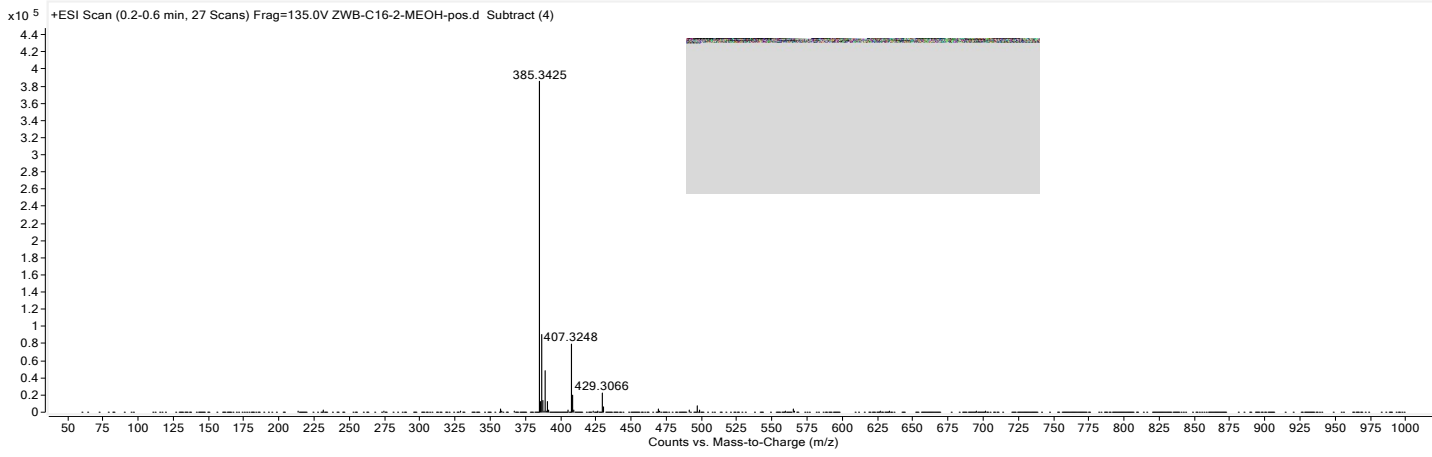

**sodium N<sup>α</sup>- stearamide lysine (4g)**

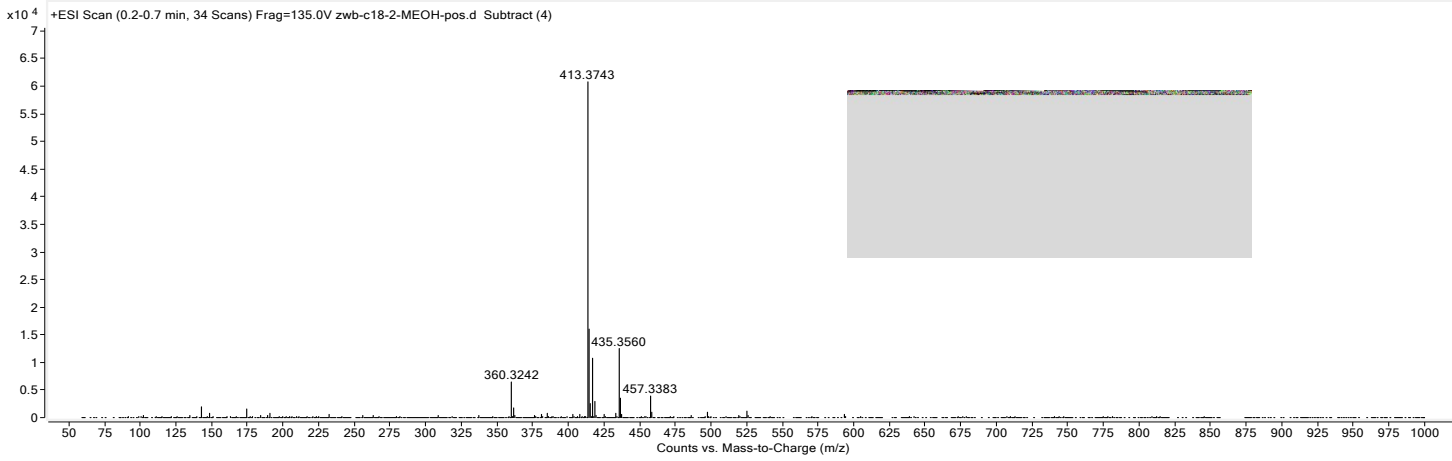

### 3. Copy of UV Absorption Spectra

sodium N<sup>α</sup>- capramide lysine (4c)

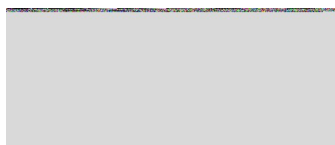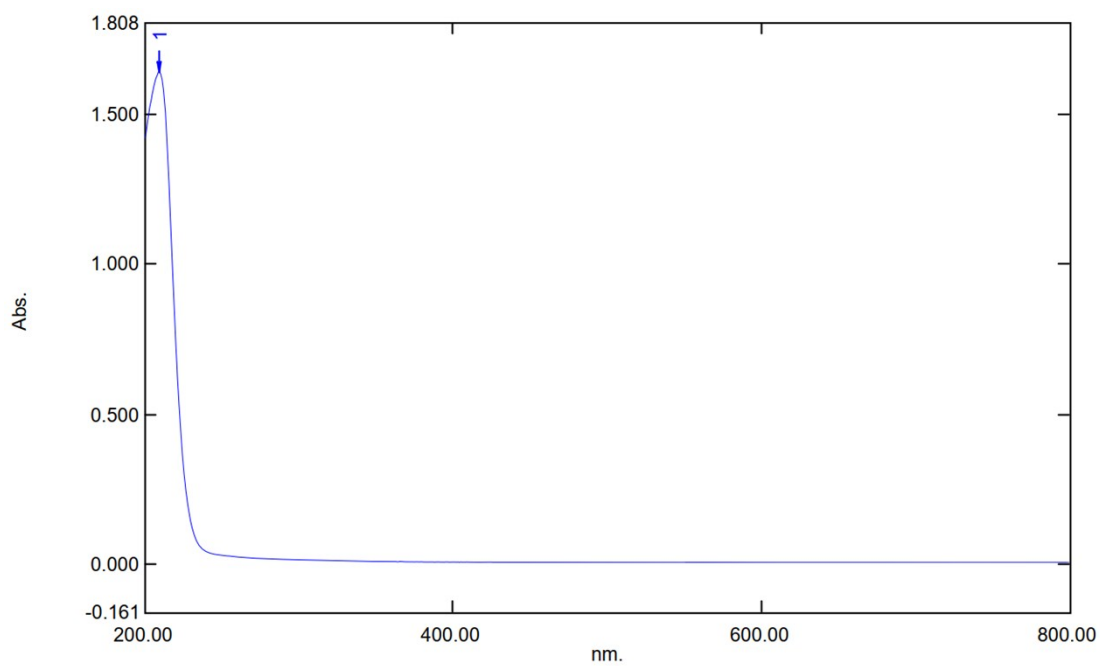

## 4. Copies of XRD

sodium N $\alpha$ -octanamide lysine (4b)

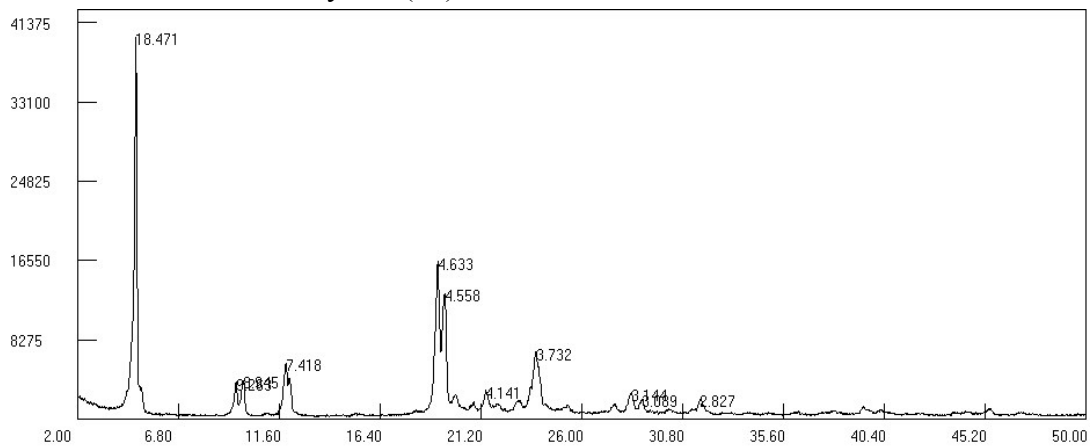

sodium N $\alpha$ -capramide lysine (4c)

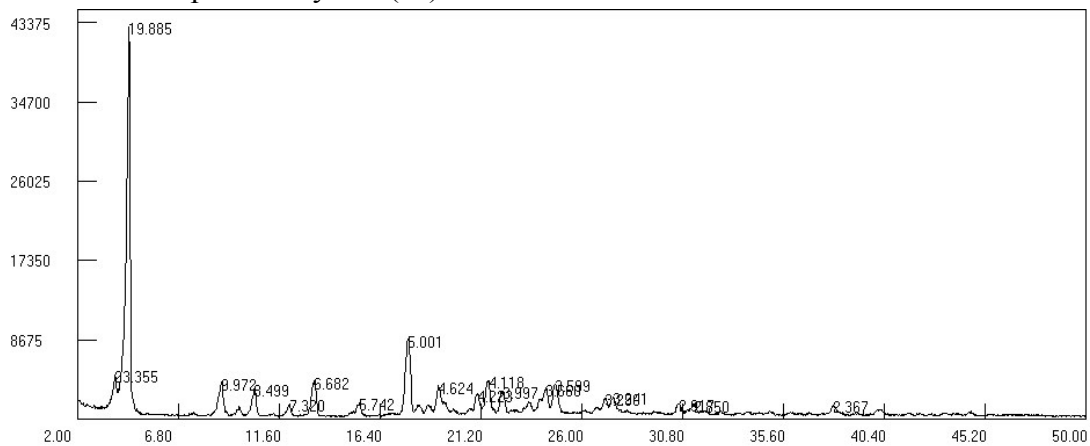

sodium N $\alpha$ -lauramide lysine (4d)

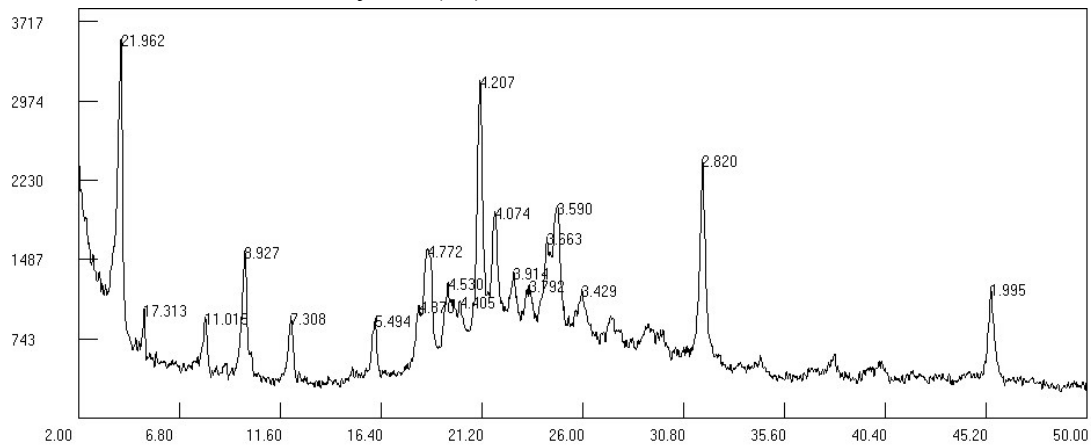

Supplement: c9ra00213h1.pdf [file c9ra00213h1.pdf]
